# Supplementary material for: Stomata in Close Contact: The Case of Pancratium maritimum L. (Amaryllidaceae)
Source: MDPI journal article supplement (doi:10.3390/plants11233377), 2022-12-05
Supplement: s1 [file s1]

# Stomata in close contact: The case of *Pancratium maritimum* L. (Amaryllidaceae)

Pavlos Saridis <sup>1</sup>, Xenia Georgiadou <sup>1,2†</sup>, Ilana Shtein <sup>3</sup>, John Pouris <sup>1</sup>, Emmanuel Panteris <sup>4</sup>, Sophia Rhizopoulou <sup>1</sup>, Theophanis Constantinidis <sup>2</sup>, Eleni Giannoutsou <sup>1\*</sup>, Ioannis – Dimosthenis S. Adamakis <sup>1\*</sup>

<sup>1</sup> Section of Botany, Department of Biology, National and Kapodistrian University of Athens, 15784 Athens, Greece

<sup>2</sup> Section of Ecology and Systematics, Department of Biology, National and Kapodistrian University of Athens, 15784 Athens, Greece

<sup>3</sup> Eastern R&D Center, Milken Campus, Ariel, Israel

<sup>4</sup> Department of Botany, School of Biology, Aristotle University of Thessaloniki, 541 24 Thessaloniki, Greece

† Current address: Institute of Natural Sciences, University of Graz, NAWI Graz, Heinrichstrasse 28, Graz 8010, Austria

\* Correspondence: EG: [egianno@biol.uoa.gr](mailto:egianno@biol.uoa.gr), I-D. S. A: [iadamaki@biol.uoa.gr](mailto:iadamaki@biol.uoa.gr)

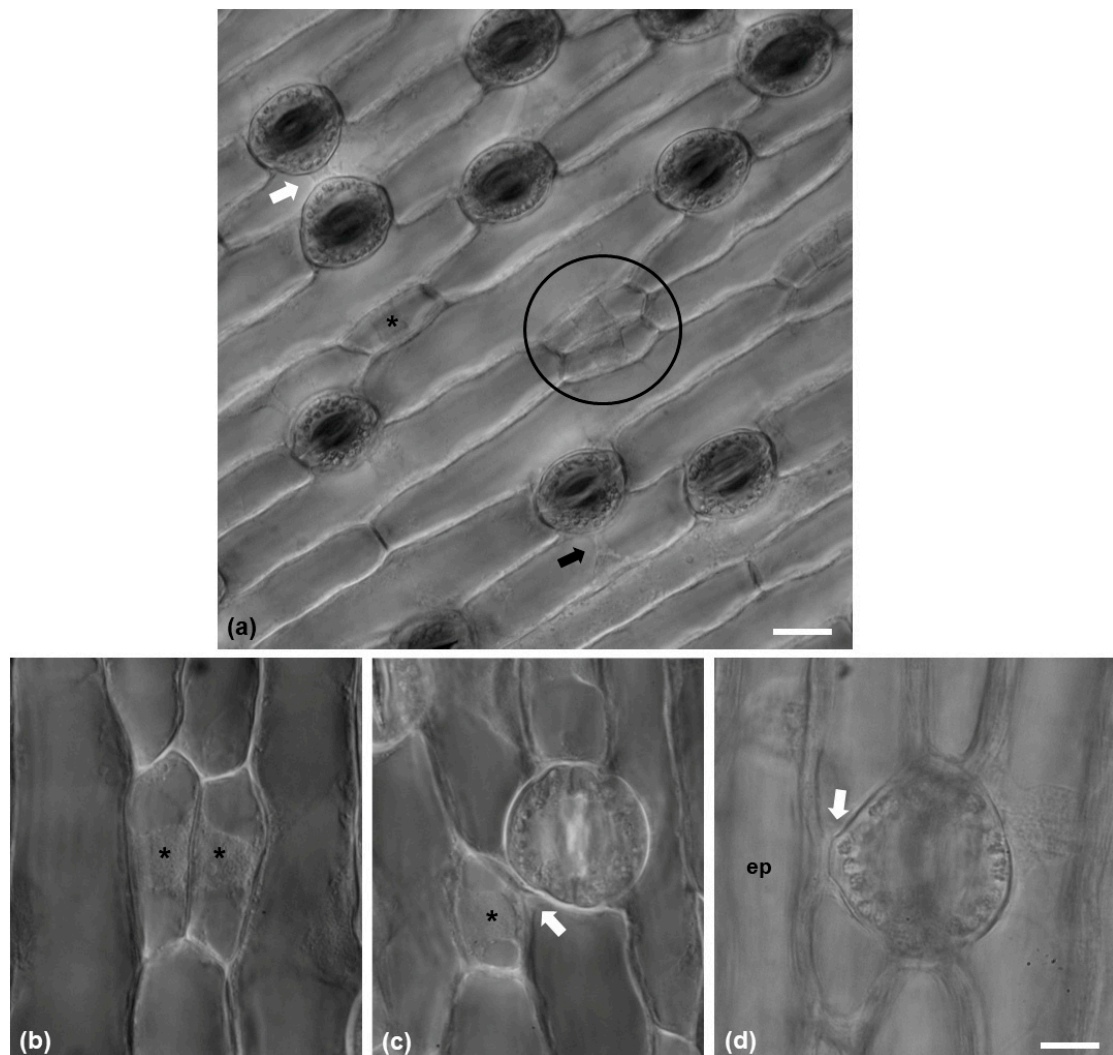

**Figure S1.** (a-d) Light micrographs of paradermal leaf sections with DIC (Nomarski) optics, showing the variety of the stomata peculiarities observed in *Pancratium maritimum*. (a) Overview of an epidermal area where connected stomata (white arrow), a single guard mother cell (asterisk), two guard mother cells in contact (circle) and a stomata connected to an epidermal cell (black arrow) are depicted. (b) A higher magnification of the guard mother cells (asterisks) in contact is shown in (a). (c) A meristemoid (asterisk) in contact (arrow) with a stoma. (d) A stoma connected (arrow) with an epidermal cell. Ep: epidermal cell. Scale bar in (a): 10  $\mu$ m. Scale bars in (b, c, d): 20  $\mu$ m.
